# Supplementary material for: Ester-free thiol-X resins: new materials with enhanced mechanical behavior and solvent resistance
Source: Royal Society of Chemistry journal article supplement (doi:10.1039/c4py01552e), 2015-01-01
Supplement: c4py01552e1.pdf [file c4py01552e1.pdf]

Supporting information.

## Ester-free Thiol-X Resins: New Materials with Enhanced Mechanical Behavior and Solvent Resistance

Maciej Podgórski<sup>†‡</sup>, Eftalda Becka<sup>†</sup>, Shunsuke Chatani<sup>†</sup>, Mauro Claudino<sup>†</sup>, Christopher N. Bowman<sup>†\*</sup>

<sup>†</sup>Department of Chemical and Biological Engineering, University of Colorado, UCB 596, Boulder, Colorado 80309, United States

<sup>‡</sup>Faculty of Chemistry, Department of Polymer Chemistry, Maria Curie-Skłodowska University, pl. Marii Curie-Skłodowskiej 5, 20-031 Lublin, Poland

Table S1. Double bond consumption rates for the tested compositions.

RP<sub>(max)</sub> values were calculated between 10 and 40 % double bond conversions, and they are average values of three IR runs.

| <b>Compositions</b> | <b>RP<sub>(max)</sub> (mmol×s<sup>-1</sup>)</b> | <b>St. Dev.</b> |
|---------------------|-------------------------------------------------|-----------------|
| <b>SiTSH/DVS</b>    | <b>0.206</b>                                    | <b>0.039</b>    |
| <b>PETMP/DVS</b>    | <b>0.038</b>                                    | <b>0.004</b>    |
| <b>SiTSH/TMPTA</b>  | <b>0.015</b>                                    | <b>0.001</b>    |
| <b>PETMP/TMPTA</b>  | <b>0.002</b>                                    | <b>0.001</b>    |
| <b>SiTSH/TTT</b>    | <b>0.072</b>                                    | <b>0.002</b>    |
| <b>PETMP/TTT</b>    | <b>0.386</b>                                    | <b>0.048</b>    |

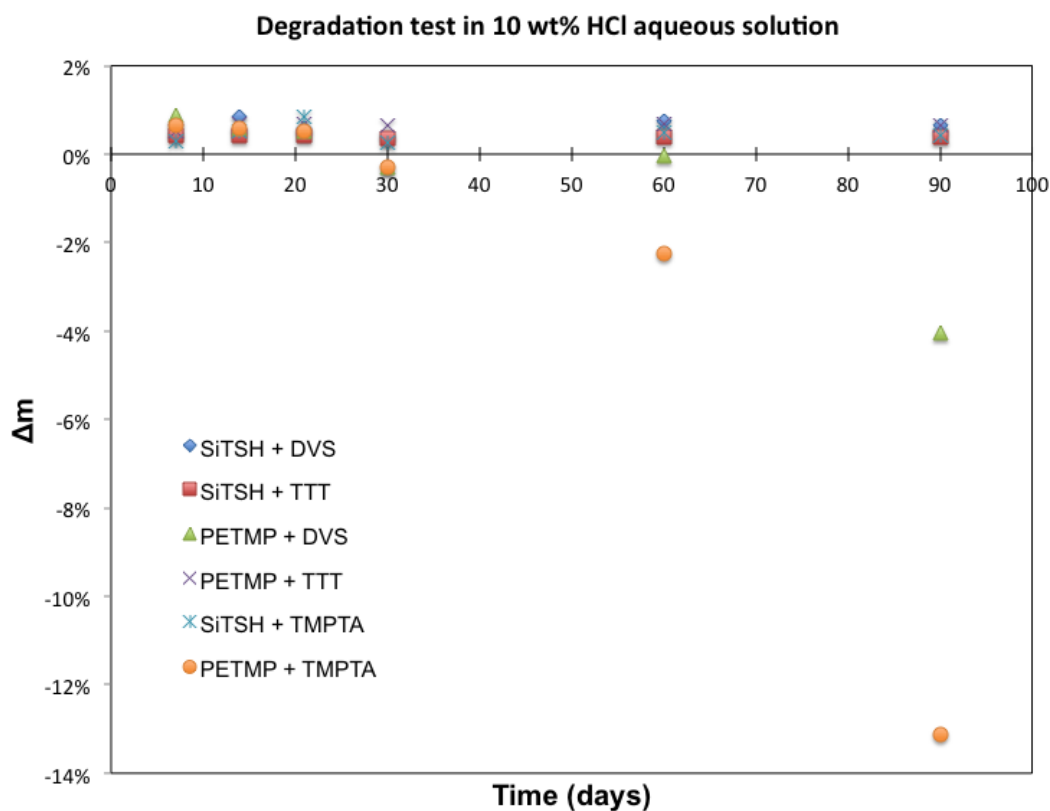

Fig. S1. Degradation behavior in 10 % HCl aqueous solution over 90 day period.

Table S2. Summary of the solvent resistance properties in 10% HCl<sub>aq</sub> after 30, 60 and 90 days of treatment.

| Resin       | Cured Resin Properties                   |                                          |                                          |
|-------------|------------------------------------------|------------------------------------------|------------------------------------------|
|             | wt % Loss/Gain<br>(10 wt% HCl)<br>Day 30 | wt % Loss/Gain<br>(10 wt% HCl)<br>Day 60 | wt % Loss/Gain<br>(10 wt% HCl)<br>Day 90 |
| SiTSH/TTT   | +0.4 ± 0.1                               | +0.4 ± 0.1                               | +0.4 ± 0.1                               |
| PETMP/TTT   | +0.7 ± 0.1                               | +0.7 ± 0.1                               | +0.7 ± 0.1                               |
| SiTSH/TMPTA | +0.4 ± 0.1                               | +0.5 ± 0.1                               | +0.4 ± 0.1                               |
| PETMP/TMPTA | +0.5 ± 0.3                               | -2.2 ± 0.1                               | -13. ± 1                                 |
| SiTSH/DVS   | +0.6 ± 0.2                               | +0.7 ± 0.2                               | +0.7 ± 0.2                               |
| PETMP/DVS   | +0.9 ± 0.1                               | -0.1 ± 0.1                               | -4.0 ± 0.1                               |

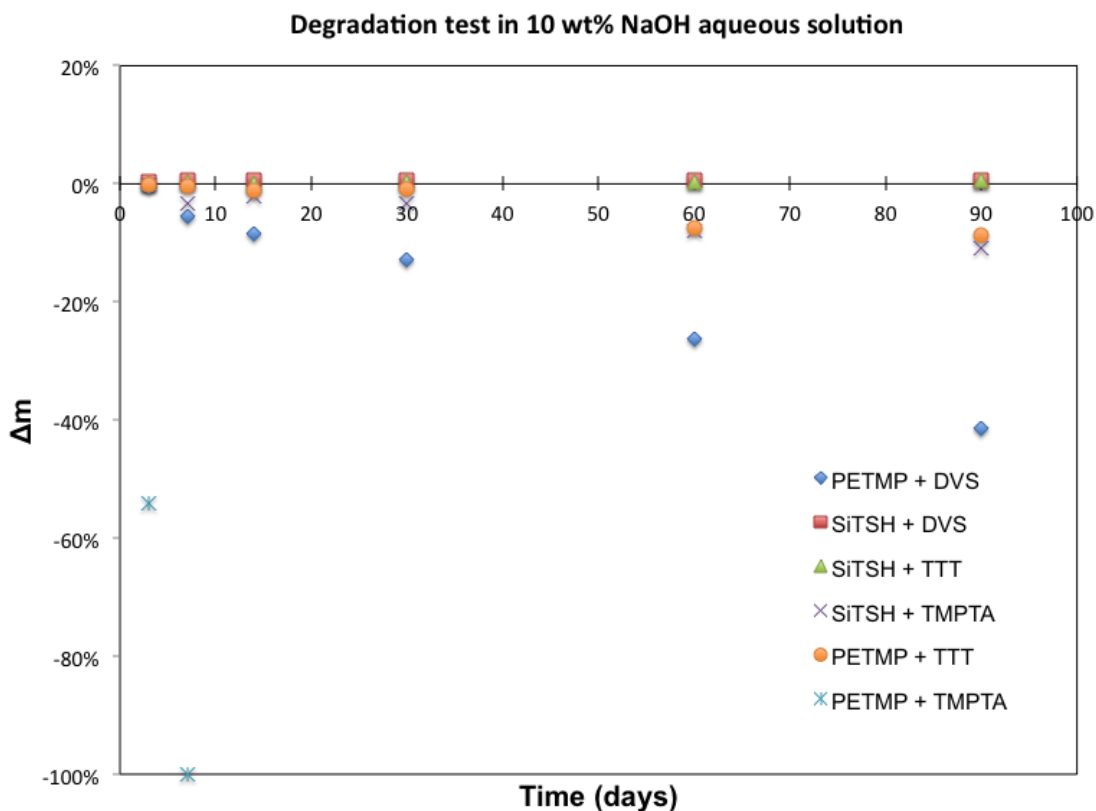

Fig. S2. Degradation tests in 10 % NaOH aqueous solution over 90 day period.

Table S3. Summary of the solvent resistance properties in 10% NaOH<sub>aq</sub> after 30, 60 and 90 days of treatment.

| Resin       | Cured Resin Properties                    |                                           |                                           |
|-------------|-------------------------------------------|-------------------------------------------|-------------------------------------------|
|             | wt % Loss/Gain<br>(10 wt% NaOH)<br>Day 30 | wt % Loss/Gain<br>(10 wt% NaOH)<br>Day 60 | wt % Loss/Gain<br>(10 wt% NaOH)<br>Day 90 |
| SiTSH/TTT   | +0.3 ± 0.1                                | +0.2 ± 0.1                                | + 0.5 ± 0.1                               |
| PETMP/TTT   | -1.0 ± 0.1                                | -3.6 ± 0.6                                | -7.9 ± 1.5                                |
| SiTSH/TMPTA | -3.3 ± 0.6                                | -7.9 ± 0.7                                | -11 ± 2                                   |
| PETMP/TMPTA | Degraded after 7<br>days                  | -                                         | -                                         |
| SiTSH/DVS   | +0.6 ± 0.2                                | +0.5 ± 0.3                                | +0.7 ± 0.1                                |
| PETMP/DVS   | -12.9 ± 0.1                               | -26 ± 1                                   | -41 ± 4                                   |
